# Supplementary material
Source: Research Square preprint supplement (doi:10.21203/rs.3.rs-9396562/v1)
Supplement: Supplementary file 1 [file 0efe608be44b4409a018b2c5.docx]

**Overcoming barriers in global nursing leadership development: participant experiences and a novel framework for equitable blended learning**

# **Questionnaire for educators**

# **Biographic Information**

1. What is your age?
2. What is your gender?

| a | Male | ☐ |
| --- | --- | --- |
| b | Female | ☐ |
| c | Prefer not to say | ☐ |

1. For how many years and months have you used Canvas for teaching?

_______________________

1. How do you describe your internet availability during the training of cohort 1?

| a | Fair | ☐ |
| --- | --- | --- |
| b | Good | ☐ |
| c | Poor | ☐ |

# **Section B: Facilitators and barriers:**

*This section pertains to what transpired during the training of the first three cohorts of the Global Leadership in Nursing and Midwifery (GLNM)Program.*

|  | **Question** | **Probe** |
| --- | --- | --- |
| 1 | Can you describe your experience during GLNM teaching? | Duration.  The positive experiences.  Negative experiences. |
| 2 | What was helpful for online teaching? | From the University  Canvas teaching platform.  Peers  Students  Probe for specific examples |
| 3 | What made project coaching easier? | Clarity of expectations?  Student factors?  Logistics – time, supportive administrators  Other  Probe for specific examples |
| 4 | What made project coaching difficult for you? | Clarity of expectations?  Student factors?  Logistics – time, supportive administrators  Other  Probe for specific examples |
| 5 | How should the difficulties be overcome? | University level  Canvas platform  Student level  Incentives (specify)  Other  Probe for specific examples |
| 6 | Do you have anything else regarding challenges and enablers to GLNM online learning. |  |
