# Supplementary material
Source: Research Square preprint supplement (doi:10.21203/rs.3.rs-9396562/v1)
Supplement: Supplementary file 2 [file f7c08fa17125214642fdca5f.docx]

**Overcoming barriers in global nursing leadership development: participant experiences and a novel framework for equitable blended learning**

# **Questionnaire for learners**

# **Biographic Information**

☐☐

1. What is your age?
2. What is your gender?

| a | Male | ☐ |
| --- | --- | --- |
| b | Female | ☐ |
| c | Prefer not to say | ☐ |

1. Do you own a functional smart mobile gadget?

| a | Yes | ☐ |
| --- | --- | --- |
| b | No | ☐ |

1. Can you use a computer?

| a | Yes | ☐ |
| --- | --- | --- |
| b | No | ☐ |
| c | Do not know | ☐ |

1. For how many years and months have you used Canvas for learning?_______
2. How do you describe your internet availability during the training of cohort 1?

| a | Fair | ☐ |
| --- | --- | --- |
| b | Good | ☐ |
| c | Poor | ☐ |

**Section B: Facilitators and barriers:**

*This section pertains to what transpired during your Global Leadership in Nursing and Midwifery (GLNM) training.*

|  | **Question** | **Probes** |
| --- | --- | --- |
| 1 | Can you describe your experience during GLNM learning? | Duration.  The positive experiences.  Negative experiences. |
| 2 | What was helpful for online learning? | From the University  Canvas teaching platform.  Peers  Students  Probe for specific examples |
| 3 | What made online learning difficult for you? | Poor motivation/expectation  Resource intensive  Content not suitable  Lack of IT skills, connectivity challenges, hard to communicate, hard to interact, cannot apply the learnt skills,  Lack of space at home Family or personal problems, family distraction,  Lack of motivation,  Low teaching quality  Logistics – lack of networking, different time zones  Probe for specific examples |
| 4 | What made doing the project easier? | Personal/family, work related, Personal/family, work related, Clarity of expectations?  Student factors?  Logistics – time, supportive administrators  Other  Probe for specific examples for each |
| 5 | What made doing the project difficult for you? | Personal/family, work related, Clarity of expectations?  Student factors?  Logistics – time, supportive administrators  Other  Probe for specific examples |
| 6 | What causes dropping from the GLNM program? | Poor motivation/expectation  Resource intensive  Content not suitable  Lack of IT skills, connectivity challenges, hard to communicate, hard to interact, cannot apply the learnt skills,  Lack of space at home Family or personal problems, family distraction,  Lack of motivation,  Low teaching quality  Logistics – lack of networking, different time zones Probe for specific examples |
| 7 | How could online learning challenges be overcome? | University level  Canvas platform  Student level  Content  Incentives (specify)  Probe for specific examples for each |
| 8 | Do you have anything else regarding challenges and enablers to GLNM online learning. |  |
